# Supplementary material for: Ionic liquid–solvent mixtures as supercapacitor electrolytes for extreme temperature operation
Source: Royal Society of Chemistry journal article supplement (doi:10.1039/c2ra20177a), 2012-01-01

## Supplementary information

Fig. S1. Ionic conductivity versus molecular solvent concentration for IL – mixtures with several carbonates. Room temperature.

Fig. S2. a) Viscosity and b) conductivity Arrhenius plots for the neat IL and their mixtures with carbonate – derived solvents.

Fig. S1. Ionic conductivity versus molecular solvent concentration for IL – mixtures with several carbonates. Room temperature.

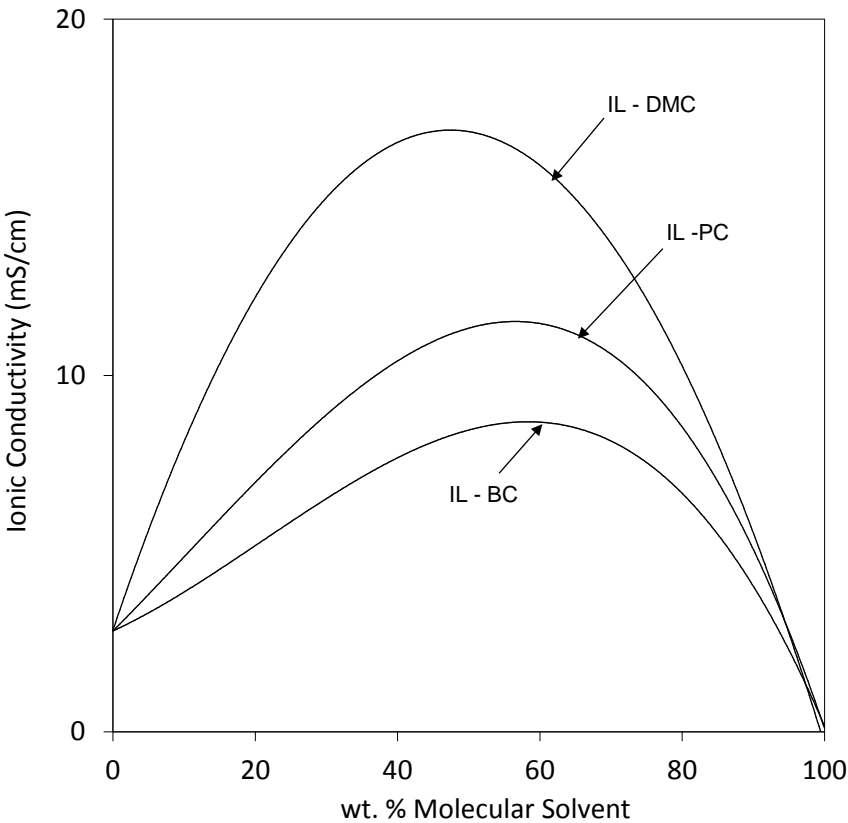

Fig. S2. a) Viscosity and b) conductivity Arrhenius plots for the neat IL and their mixtures with carbonate – derived solvents.

a)

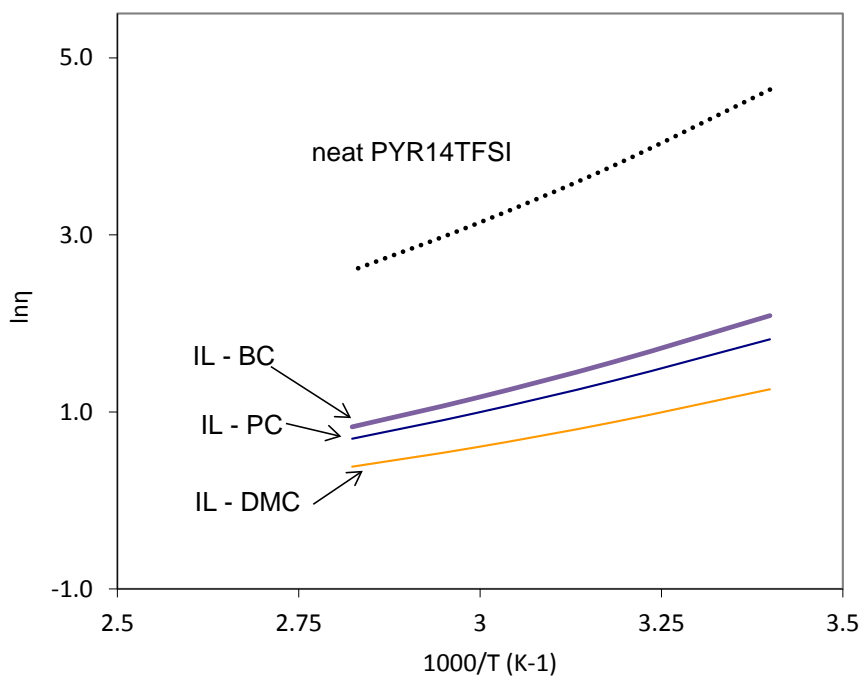

b)

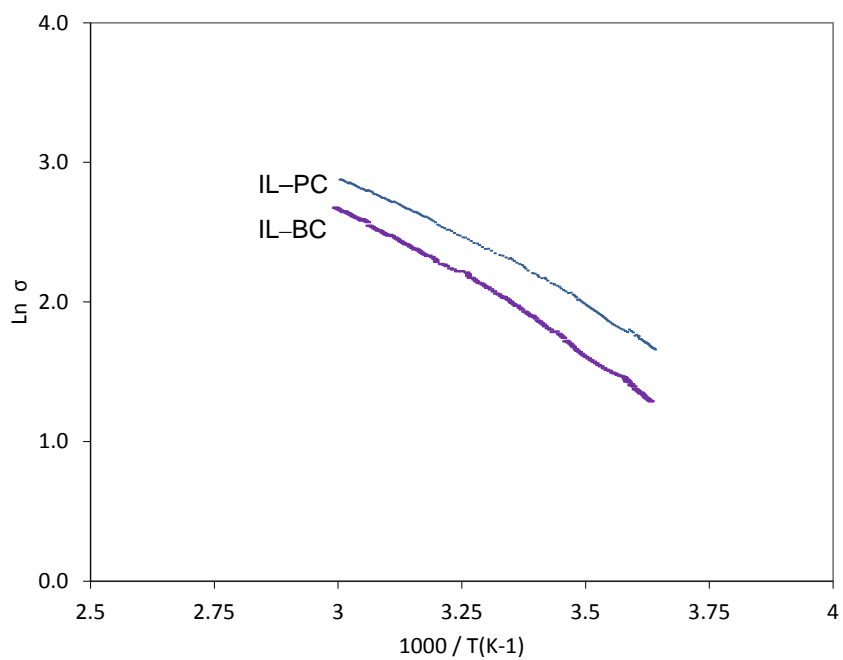

Supplement: c2ra20177a.pdf [file c2ra20177a.pdf]
